# Supplementary material
Source: PubMed Central journal article supplement (PMC10155061)
Supplement: jama-e232661-s002.pdf [file jama-e232661-s002.pdf]

## **Data Sharing Statement**

### **Data**

**Data available:** Yes

**Data types:** Data (not involving human participants)

**How to access data:** Interested parties are able to request access to data by contacting the corresponding author.

**When available:** With publication

### **Supporting Documents**

**Document types:** None

### **Additional Information**

**Who can access the data:** Researchers whose proposed use of the data has been approved.

**Types of analyses:** Any purpose for which the data are fit.

**Mechanisms of data availability:** Data will be made available with a signed data access agreement.
